# Supplementary material for: Synthesis of the RuIV amido complex [TpRu(CO)(PPh3)(NHPh)][OTf]2 (Tp = hydridotris(pyrazolyl)borate; OTf = trifluoromethanesulfonate) and deprotonation to form an octahedral and d4 imido complex: computational study of RuIV–imido bondingElectronic supplementary information (ESI) available: experimental procedures; Table 1 comparing calculated structural parameters for complex 2 versus data from the CSD; references. See http://www.rsc.org/suppdata/cc/b1/b110999e/
Source: Royal Society of Chemistry journal article supplement (doi:10.1039/b110999e), 2002-01-29
Supplement: b110999e.doc [file b110999e.doc]

**SUPPORTING INFORMATION**

**FOR**

**Synthesis of the Dicationic RuIV Amido Complex [TpRu(CO)(PPh3)(NHPh)][OTf]2 (Tp = hydridotris(pyrazolyl)borate; OTf = trifluoromethanesulfonate) and Deprotonation to Form a Thermally Unstable Octahedral and *d*4 Imido Complex: Computational Study of RuIV-Imido Bonding****

K. N. Jayaprakash, Aaron M. Gillespie, T. Brent Gunnoe*, and David P. White*

* Prof. T. B. Gunnoe, Dr. K. N. Jayaprakash

Department of Chemistry, North Carolina State University

Campus Box 8204, Raleigh, NC 27695-8204 (USA)

FAX: 919-515-8909

E-mail: brent_gunnoe@ncsu.edu

* Prof. David P. White, Aaron M. Gillespie

Department of Chemistry, University of North Carolina at Wilmington

601 South College Road, Wilmington, NC 28403

FAX: 910-962-3013

E-mail: whitedp@uncwil.edu

**CONTENTS OF SUPPORTING INFORMATION**

p. 3 Experimental procedures

p. 9 Table S1 comparing calculated structural parameters for complex **2** versus data from the CSD.

p. 10 References

*Experimental Section:*

All procedures were performed under inert atmosphere (nitrogen) in a nitrogen filled glovebox or using standard Schlenk techniques. All solvents were rigorously dried using conventional methods and stored in the glovebox. 1H and 13C NMR measurements were performed on either a GE 300 MHz or Varian Mercury 300 MHz spectrometer. All 31P spectra were recorded on a Varian Mercury 300 MHz instrument operating at a frequency of 125 MHz with 85% phosphoric acid as external standard. Room temperature infrared spectra were recorded on a Mattson Genesis-II spectrometer as thin films on KBr plates. TpRu(CO)(PPh3)(NHPh) was prepared according to a published procedure.[1] NaBAr'4 was prepared according to a published procedure.[2] All other reagents were used as purchased from commercial sources.

**[TpRu(CO)(PPh3)(NHPh)][OTf]2 (1).** TpRu(CO)(PPh3)(NHPh) (0.6938g, 0.996 mmol) and triethylamine (5 eq) were dissolved in approximately 50 mL of methylene chloride. AgOTf (0.512 g, 1.99 mmol dissolved in 5 mL of THF) was added to the resulting solution. Upon addition of AgOTf, the color of the solution changed rapidly to dark blue from yellowish brown. The mixture was stirred for approximately one hour and filtered through a plug of celite followed by filtration through a small plug of silica gel. Removal of volatiles under reduced pressure gave a dark blue residue. The crude product mixture was stirred with toluene for two days, filtered, and the resulting dark blue solid was washed with hexanes and dried *in vacuo* to give the product (0.850 g, 85%). IR (thin film on KBr plate): CO = 1996 cm-1; NH = 3225 cm-1. 1H NMR (CD3CN, , 25 ºC): 10.18 and 10.14 (each a br s, N*H* of two rotational isomers), 8.00, 7.98, 7.91, 6.50 (each 1H, each a d, 3JHH = 2 Hz, Tp C*H* 3 and 5 position), 7.52 - 7.12 (15H total, overlap of resonances for Tp C*H* 3 and 5 position, amido phenyl and PPh3), 6.98 (6H, m, overlap of Tp C*H* 3 or 5 position, amido phenyl, and PPh3), 6.90 (1H, t, 3JHH = 6 Hz, *para* of amido phenyl), 6.30, 6.10, 6.02 (each 1H, each a t, 3JHH = 2 Hz, Tp C*H* 4 position). 13C{1H} NMR (CD3CN, 25 ºC): 203.0 (d, 2JPC = 15 Hz, *C*O), 171.6 (s, ipso carbon of amido phenyl), 146.9, 145.8, 144.9, 139.7, 138.3, 137.9 (each a s, Tp *C*H's), 137.2, 134.9, 134.8, 132.6, 130.3, 130.2, 129.8, 129.5, 128.5, 126.6 (PPh3 and amido phenyl resonances), 108.5, 108.3, 107.9 (each a s, Tp 4 position *C*H's). 31P{1H} NMR (CD3CN, 25 ºC): 42.2.

**[TpRu(CO)(PPh3)(NHPh)][BAr'4]2 (1-BAr'4).** Complex **2** (1.0685 g, 1.074 mmol) was dissolved in THF (40 mL), and an ethereal solution of NaBAr'4 (1.9049g, 2.15 mmol) was added to the THF solution. The mixture was stirred for 24 h at room temperature and the volatiles were removed under reduced pressure to yield a dark blue residue. The residue was dissolved in CH2Cl2 and vacuum filtered through a fine porosity frit. Removal of the volatiles under reduced pressure gave the desired product quantitatively. 1H NMR (CD2Cl2, , 25 ºC): 9.16, 9.12 (1H, each a br s, N*H* of two rotational isomers), 7.88, 7.80 (3H, each d, 3JHH = 2 Hz, Tp C*H* 3 or 5 position), 7.74 (16H, br s, *ortho* protons of BAr'4), 7.57 (8H, br s, *para* protons of BAr'4), 7.47, 7.33, 6.97 (18H, m, overlap of Tp C*H* 3 or 5 position and PPh3), 6.84, 6.60, 5.98 (5H, each a m, amido phenyl), 6.47, 6.20, 6.06 (3H, t, 3JHH = 2 Hz, Tp C*H* 4 position). Anal. Calcd for C98H55B3F7N7O1PRu-(C4H8O)2 (note: two equivalents of THF are clearly observed in the 1H NMR spectrum of the sample which was submitted for elemental analysis): C, 49.59; H, 2.79; N, 3.82; Found: C, 49.41; H, 2.89; N, 4.36.

**Variable Temperature 1H NMR Experiments for [TpRu(CO)(PPh3)(NHPh)][OTf]2 (1).** At room temperature the 1H NMR spectrum of complex **1** shows two broad downfield resonances that have been assigned as resonances due to the amido protons as well as broad resonances due to the Tp and PPh3 ligands. In contrast with the two amido resonances (due to two rotational isomers), the resonances due to the Tp and PPh3 resonances are consistent with a single isomer at room temperature indicating that the chemical shift difference between the two isomers' amido NH resonances is larger than the two isomers' Tp and PPh3 resonances. However, the resonances due to the Tp and PPh3 ligands are broad at room temperature. Upon heating a CD3CN solution of **1**, the downfield signals coalesce into a single resonance and the Tp and PPh3 resonances sharpen. Cooling the solution back to room temperature results in a spectrum identical to the original 1H NMR spectrum (i.e., before heating). Cooling a CD2Cl2 solution results in the two downfield resonances initially sharpening with no change in chemical shift; however, at -20 ºC both resonances broaden until at -90 ºC several broad resonances (with poor signal to noise ratio) are observed, and the Tp and PPh3 regions of the spectrum become convoluted with the appearance of multiple resonances. The presence of two rotational isomers would result in a total of 24 resonances (all multiplets) in the aromatic region due to the Tp and PPh3 ligands. The variable temperature NMR characteristics are consistent with hindered rotation around the ruthenium-amido nitrogen bond. The rotational barrier (73.6 kJ mol-1) was calculated using the difference in chemical shift for the amido resonances at -20 ºC and the coalescence temperature. Since no movement in the chemical shift for the amido resonances was noted between 0 ºC and -20 ºC we presume that the calculated barrier is close to the actual value. The appearance of multiple downfield resonances (amido protons) at lower temperatures is attributed to the coupling of the amido protons for the two rotational isomers with quadrupolar nitrogen (14N, 99.63%, I = 1) yielding multiple *broad* peaks. The signal to noise ratio of these resonances is too broad to reliably determine coupling constants or other information. In addition, for one of the rotational isomers of TpRu(CO)(PPh3)(NHPh) the amido proton exhibits 3JPH = 9 Hz, and it is possible an amido proton of one isomer of complex **1** couples to phosphorus further convoluting the low temperature spectra. The 15N labeled complex [TpRu(CO)(PPh3)(15NHPh)][OTf]2 has been prepared, and the two amido proton resonances are split into doublets at room temperature (1JNH = 71 Hz). Although the signal to noise ratio is poor, at low temperature the two doublets for the isotopically labeled amido ligand are split into six broad peaks consistent with one of the rotational isomers coupling with phosphorus.

**[TpRu(CO)(PPh3)(NPh)][OTf] (2).** In an NMR tube, complex **1** (0.0210 g, 0.211 mmol) was dissolved in [D8]-THF (0.5 mL), and the solution was cooled to -78 ºC. NaN(SiMe3)2 (22 L, 1.05 eq, 1M solution in THF) was slowly added via microsyringe. The color of the solution immediately changed to purple. The mixture was maintained at -78 ºC for 30 minutes, transferred to an NMR probe (-78 ºC) and NMR spectra were acquired. 1H NMR indicated the formation of HN(SiMe3)2, and the resonances due to complex **1** had disappeared with no observation of resonances due to the formation of a new TpRu complex.

In order to obtain the IR spectrum of complex **2**, in a large scale reaction complex **1** was treated with one equivalent of NaN(SiMe3)2 at -78 C while monitoring with an ASI React IR 1000 spectrometer equipped with a SiComp probe. After addition of the base, the CO stretching frequency due to complex **1** (1996 cm-1) disappeared while two new CO stretching frequencies were observed at 1972 (minor) and 1930 cm-1. We attribute the CO stretching frequency at 1930 cm-1 to the imido complex **2** since this absorption begins to dissipate at temperatures above -50 C. In contrast, the intensity of the CO stretching frequency at 1972 cm-1 increases as the temperature is raised. Therefore, in the scaled up reaction the formation of decomposition products are observed even at low temperatures. In contrast, for the sealed NMR tube reactions evidence for decomposition products is absent until temperatures greater than -50 C are reached. For example, see the protonation studies immediately below and 31P NMR studies above. At temperatures > -50 C the absorption at 1930 cm-1 dissipates while the absorption at 1972 cm-1 increases in intensity.

**Deprotonation and protonation of complex 1 at -78 C.** In order to confirm that the imido complex **2** is *cleanly* generated in the NMR tube experiments at low temperature, the deprotonation of **1** was repeated at -78 C. After allowing the solution to react for 30 minutes and confirming that complex **1** was consumed via 1H NMR spectroscopy, 1 equivalent of HBF4 was added to the NMR tube. After addition of the acid, 1H NMR spectroscopy indicated nearly quantitative formation of the Ru(IV) amido complex **1** (based on integration versus the deuterated solvent). Based on these results, we have concluded that the amido complex **2** is cleanly and reversibly deprotonated at low temperature in the NMR tube experiments.

**Computational Methods for [TpRu(CO)(PPh3)(NPh)][OTf] (2).** The complex was sketched in Cerius2 and energy-minimized using the Universal Force Field (UFF).[3] A conformational search was carried out in Cerius2 in which all rotatable bonds were simultaneously varied by randomly different amounts to produce a total of 2000 structures. Each of these structures was minimized using the SMART minimizer with a tight termination criterion.[4] The lowest energy structure was submitted to Spartan for PM3(tm) optimization. The complex was geometry optimized in the singlet and triplet states with the PM3(tm) level of theory. The PM3(tm)-optimized structures were submitted to Dmol3 for DFT optimization.[5] DFT optimization was performed using the BOP functional and the DNP basis set with VSPR relativistic pseudopotential.[6] Single point energy calculations were performed on the BOP/DNP optimized structures with a DNPP basis set. The triplet state of **2** was optimized using unrestricted spin polarization since spin contamination using DFT methods is unlikely. ONIOM calculations on **2** were performed using the B3LYP[7, 8] functional in Gaussian 98.[9] For the ONIOM calculations, the phenyl rings of PPh3 were modeled using UFF and the rest of the molecule modeled using B3LYP.

**Table S1.** Comparison of BOP/DNPP Optimized Bond Lengths (in Å) and Angles (º) **2** with Structural Parameters from the CSD.

| Bond or Angle | BOP/DNPP Structure[[1]](#footnote-2) | X-Ray[[2]](#footnote-3) |
| --- | --- | --- |
| Ru-N | 2.14 – 2.15 (2.18 – 2.21) | 2.11(5), *n* = 102 |
| Ru-CO | 1.89 (1.91) | 1.87(5), *n* = 450 |
| Ru-P | 2.39 (2.54) | 2.34(5), *n* = 2138 |
| Ru-N= | 1.97 (1.96) | 1.76(7), *n* = 30[[3]](#footnote-4) |
| CO | 1.16 (1.16) | 1.14(3), *n* = 450 |
| Ru-C-O | 174 (175) | 177(2), *n* = 450 |
| Ru-N-C | 146 (155) | 166(11), *n* = 30C |

**References.**

[1]K. N. Jayaprakash, T. B. Gunnoe, P. B. Boyle*, Inorg. Chem.* ***2001****, 40,* 6481*.*

[2]M. Brookhart, B. Grant, J. Volpe, A. F., *Organometallics* ***1992****, 11,* 3920*.*

[3] A. K. Rappé, C. J. Casewit, K. S. Colwell, W. A. Goddard, III, W. M. Skiff, *J. Am. Chem. Soc.* ***1992****, 114,* 10024*.*

[4] M. Brookhart, Y. Liu, E. W. Goldman, D. A. Timmers, G. D. Williams, *J. Am. Chem. Soc.* ***1991****, 113,* 927*.*

[5] B. Delley*, J. Phys. Chem.* ***1990****, 92,* 508 *.*

[6] T. Tsuneda, T. Suzumura, K. Hirao*, J. Chem. Phys.* ***1999****, 110,* 10664*.*

[7] A. D. Becke*, J. Chem. Phys.* ***1992****, 98,* 5648 *.*

[8] C. Lee, W. Yang, R. G. Parr, *Phys. Rev., B* ***1988****, 37,* 785*.*

[9] M. J. Frisch, G. W. Trucks, H. B. Schlegel, G. E. Scuseria, M. A. Robb, J. R. Cheeseman, V. G. Zakrzewski, J. A. MontgomeryJr., R. E. Stratmann, J. C. Burant, S. Dapprich, J. M. Millam, A. D. Daniels, K. N. Kudin, M. C. Strain, O. Farkas, J. Tomasi, V. Barone, M. Cossi, R. Cammi, B. Mennucci, C. Pomelli, C. Adamo, S. Clifford, J. Ochterski, G. A. Petersson, P. Y. Ayala, Q. Cui, K. Morokuma, D. K. Malick, A. D. Rabuck, K. Raghavachari, J. B. Foresman, J. Cioslowski, J. V. Ortiz, A. G. Baboul, B. B. Stefanov, G. Liu, A. Liashenko, P. Piskorz, I. Komaromi, R. Gomperts, R. L. Martin, D. J. Fox, T. Keith, M. A. Al-Laham, C. Y. Peng, A. Nanayakkara, M. Challacombe, P. M. W. Gill, B. Johnson, W. Chen, M. W. Wong, J. L. Andres, C. Gonzalez, M. Head-Gordon, E. S. Replogle, J. A. Pople*, Gaussian 98, Revision A.9*, Pittsburgh, PA**1998***.*

Reference 9 above is the full reference #22 from manuscript.

1. Triplet parameters are presented in parentheses. [↑](#footnote-ref-2)
2. The CSD was searched for high quality (R < 10 %), monomeric complexes with no reported crystallographic disorder and no reported errors. [↑](#footnote-ref-3)
3. Both Ru and Os structures were included. [↑](#footnote-ref-4)
